# Supplementary material for: Genomic insights into the Montseny brook newt (Calotriton arnoldi), a Critically Endangered glacial relict
Source: PubMed Central journal article supplement — iScience. 2023 Dec 12;27(1):108665. doi: 10.1016/j.isci.2023.108665 (PMC10788218; doi:10.1016/j.isci.2023.108665), 2023-12-12
Supplement: mmc1.pdf [file mmc1.pdf]

## Supplemental information

### Genomic insights into the Montseny brook

newt (*Calotriton arnoldi*), a Critically

Endangered glacial relict

Adrián Talavera, Marc Palmada-Flores, Bernat Burriel-Carranza, Emilio Valbuena-Ureña, Gabriel Mochales-Riaño, Dean C. Adams, Héctor Tejero-Cicuéndez, Anna Soler-Membrives, Fèlix Amat, Daniel Guinart, Francesc Carbonell, Elena Obon, Tomàs Marquès-Bonet, and Salvador Carranza

**Table S1. Summary of genome assembly metrics of *Calotriton arnoldi* reference genome (aCalArn1) and the other available Caudata assemblies.** aCalArn1 shows higher contiguity at contig level (N50). Gb = Gigabase; Mb = Megabase; bp = basepairs.

| Metrics                                                                                                                                                                 | Assembly               |            |                         |
|-------------------------------------------------------------------------------------------------------------------------------------------------------------------------|------------------------|------------|-------------------------|
|                                                                                                                                                                         | aCalArn1               | AmbMex60DD | Pw_v4.2                 |
| Assembly size (no Ns) (Gb)                                                                                                                                              | 22.89                  | 28.20      | 19.26                   |
| Number of Contigs                                                                                                                                                       | 47,990                 | 211,437    | 65,627,701              |
| Number of Scaffolds                                                                                                                                                     | 47,257                 | 27,157     | 106,895                 |
| Contig N50 (Mb)                                                                                                                                                         | 1.60                   | 0.22       | 1.14                    |
| Scaffold N50 (Gb)                                                                                                                                                       | 0.00165                | 1.20571    | -                       |
| Contig L50                                                                                                                                                              | 4,166                  | 35,415     | -                       |
| Scaffold L50                                                                                                                                                            | 4,025                  | 11         | -                       |
| Shortest / longest contig (bp)                                                                                                                                          | 33 /<br>11,568,535     | 1085 / NA  | 71 /<br>7,104,246       |
| % of bp in contigs of range<br><10 <sup>2</sup> /10 <sup>2</sup> -10 <sup>3</sup> /10 <sup>3</sup> -10 <sup>4</sup> /10 <sup>4</sup> -10 <sup>5</sup> />10 <sup>5</sup> | 0 / 0 / 2 / 29<br>/ 68 | -          | 12 / 36 /<br>43 / 5 / 4 |

**Table S2. Assembly assessment of *Calotriton arnoldi* reference genome under VGP standards.** Structural accuracy, base accuracy (regarding k-mer completeness) and functional completeness are within VGP standards. BUSCO(S) = Single copy orthologs using BUSCO v5.2.2 with vertebrata ofb10 database.

| Quality Category        | Quality Metric     | VGP standard | aCalArn1                                  |
|-------------------------|--------------------|--------------|-------------------------------------------|
| Structural accuracy     | False duplications | 0.2-5.0%     | 1.84%                                     |
| Base accuracy           | Base pair QV       | 39-43        | 35.2 (80.9% ct QV > 30 ; 11.4% ct QV >39) |
| Base accuracy           | K-mer completeness | 87-98%       | 97.54%                                    |
| Functional completeness | Genes (BUSCOs (S)) | 82-98%       | 82.3%                                     |

**Table S3. Summaries of Generalized Least Squares (GLS) models describing the dependence of *Calotriton* spp. demographic trends on temperature or ice sheet volume along Late Pleistocene and Holocene while accounting for temporal autocorrelation.** Degrees of freedom (Df), Sum of Squares Type I (SS), the coefficient of determination ( $R^2$ ), F-values, the effect size (Z-score, based on the distribution of F-values obtained from permutations) and p-values are showcased. Related to Figure 2.

| Species           | Ind. variable | Df | SS         | $R^2$ | F      | Z     | p-value |
|-------------------|---------------|----|------------|-------|--------|-------|---------|
| <i>C. arnoldi</i> | temperature   | 1  | 1930869998 | 0.851 | 793.67 | 10.26 | <0.001  |
| <i>C. asper</i>   | temperature   | 1  | 3816711796 | 0.248 | 124.17 | 6.26  | <0.001  |
| <i>C. arnoldi</i> | ice volume    | 1  | 1739244848 | 0.767 | 456.32 | 8.96  | <0.001  |
| <i>C. asper</i>   | ice volume    | 1  | 1583891610 | 0.103 | 43.21  | 4.53  | <0.001  |

**Table S4. Fastsimcoal2 best-fitting run point estimations for each of the four models.** Effective population sizes ( $N_x$ ) mean “haploid” individuals.  $N_A$ ,  $N_B$  and  $N_O$  stands for current population sizes of Eastern Montseny, Western Montseny and Pyrenean brook newts, respectively.  $N_{AB}$  is population size before Montseny lineages split, and  $N_{ABO}$ , *Calotriton* population size before species divergence. Lineage divergence ( $T_{DIV}$ ) and *Calotriton arnoldi*’s bottleneck ( $T_{BOT}$ ) are measured in 4-year generations ago and migration rates ( $m_x$ ) in “haploid” migrants per generation.  $m_{arnoldi}$  stands for within species migration between Montseny lineages, whereas  $m_{asper}$  for ancestral migration from the Pyrenees into Montseny. The best-fitting model (in bold) showcases both migration patterns. Related to Table S5 and Figure S4.

|          | $N_A$      | $N_B$        | $N_O$          | $N_{AB}$       | $N_{ABO}$        | $T_{DIV}$     | $T_{BOT}$     | $m_{arnoldi}$   | $m_{asper}$     |
|----------|------------|--------------|----------------|----------------|------------------|---------------|---------------|-----------------|-----------------|
| 1        | 2,194      | 8,481        | 1,351,926      | 185,546        | 3,219,370        | 1,966         | 21,463        | -               | -               |
| 2        | 671        | 9,046        | 1,557,947      | 659875         | 3,340,096        | 330,190       | 15,171        | 3.32E-04        | -               |
| 3        | 1,205      | 8,137        | 341,330        | 7,474          | 2,598,606        | 1,644         | 15,078        | -               | 20.2            |
| <b>4</b> | <b>973</b> | <b>6,599</b> | <b>443,717</b> | <b>283,022</b> | <b>2,900,358</b> | <b>12,226</b> | <b>16,096</b> | <b>2.84E-04</b> | <b>5.98E-04</b> |

**Table S5. Fastsimcoal2 estimated composite likelihoods from best runs and fitting comparisons between models.** The best-fitting model (in bold) implies both ancestral migration from the Pyrenees into the Montseny and within-Montseny secondary contacts. Related to Figure S4.

| Model    | Max $\log_{10}(Lhood_i)$ | No. of parameters (k) | $AIC_i$       | $\Delta AIC_i$ | Model normalized relative likelihood ( $w_i$ ) |
|----------|--------------------------|-----------------------|---------------|----------------|------------------------------------------------|
| 1        | -6,133                   | 7                     | 28,255        | 2,024.444      | 0                                              |
| 2        | -6,073                   | 8                     | 27,985        | 1,754.642      | 0                                              |
| 3        | -5,733                   | 8                     | 26,419        | 188.092        | 1.433E-41                                      |
| <b>4</b> | <b>-5,692</b>            | <b>9</b>              | <b>26,231</b> | <b>0</b>       | <b>1</b>                                       |

**Table S6. Heterozygosity inferred from low coverage WGS from 17 *Calotriton arnoldi* (7 from the Eastern and 10 from the Western Montseny lineage) and 5 *C. asper* representing five mitochondrial lineages.** Diversity is higher in the Pyrenean species than in the Montseny populations. Within Montseny, the Western lineage has in general slightly higher values than the Eastern one.

| Species           | Locality           | Sample ID   | Population | 1st-scaffold heterozygosity | Whole-genome heterozygosity | Non-repetitive whole-genome heterozygosity |
|-------------------|--------------------|-------------|------------|-----------------------------|-----------------------------|--------------------------------------------|
| <i>C. arnoldi</i> | Torreferussa       | OR193       | F1 A       | 0.0000680                   | 0.0001005                   | 0.0000645                                  |
| <i>C. arnoldi</i> | Eastern Montseny   | D3247       | A1         | 0.0000520                   | 0.0000815                   | 0.0000613                                  |
| <i>C. arnoldi</i> | Eastern Montseny   | D3158       | A1         | 0.0001214                   | 0.0001115                   | 0.0000701                                  |
| <i>C. arnoldi</i> | Eastern Montseny   | D3116       | A2.1       | 0.0000420                   | 0.0000717                   | 0.0000869                                  |
| <i>C. arnoldi</i> | Eastern Montseny   | SPM12051608 | A2.2       | 0.0000441                   | 0.0000784                   | 0.0000672                                  |
| <i>C. arnoldi</i> | Eastern Montseny   | SPM12051602 | A3         | 0.0000560                   | 0.0000887                   | 0.0000736                                  |
| <i>C. arnoldi</i> | Eastern Montseny   | SPM12051601 | A3         | 0.0000436                   | 0.0000749                   | 0.0000769                                  |
| <i>C. arnoldi</i> | Western Montseny   | D3139       | B1         | 0.0000610                   | 0.0000948                   | 0.0000790                                  |
| <i>C. arnoldi</i> | Western Montseny   | D3146       | B1         | 0.0000505                   | 0.0000912                   | 0.0000783                                  |
| <i>C. arnoldi</i> | Western Montseny   | SPM13032411 | B2         | 0.0000504                   | 0.0000906                   | 0.0000729                                  |
| <i>C. arnoldi</i> | Western Montseny   | SPM11111011 | B2         | 0.0000573                   | 0.0001008                   | 0.0000758                                  |
| <i>C. arnoldi</i> | Western Montseny   | D3065       | B3         | 0.0000426                   | 0.0000850                   | 0.0000824                                  |
| <i>C. arnoldi</i> | Western Montseny   | SPM10042119 | B3         | 0.0000598                   | 0.0000946                   | 0.0000871                                  |
| <i>C. arnoldi</i> | Western Montseny   | D3085       | B4         | 0.0000453                   | 0.0000885                   | 0.0000867                                  |
| <i>C. arnoldi</i> | Western Montseny   | D3086       | B4         | 0.0000567                   | 0.0000939                   | 0.0000829                                  |
| <i>C. arnoldi</i> | Western Montseny   | D3152       | B5         | 0.0000630                   | 0.0000991                   | 0.0000811                                  |
| <i>C. arnoldi</i> | Western Montseny   | D3215       | B5         | 0.0000412                   | 0.0000843                   | 0.0001018                                  |
| <i>C. asper</i>   | Estany de Juclar   | SPM004169   | O1         | 0.0011390                   | 0.0012977                   | 0.0009025                                  |
| <i>C. asper</i>   | Vidrà              | 19030701    | O2         | 0.0009626                   | 0.0011434                   | 0.0009148                                  |
| <i>C. asper</i>   | Valle de Pineta    | SPM004784   | O3         | 0.0009621                   | 0.0013441                   | 0.0011240                                  |
| <i>C. asper</i>   | Puerto de Portalet | SPM004128   | O4         | 0.0012150                   | 0.0015156                   | 0.0012200                                  |
| <i>C. asper</i>   | Montsec de Rúbies  | B7          | O5         | 0.0008774                   | 0.0011348                   | 0.0010517                                  |

**Table S7. Observed heterozygosity ( $H_O$ ), expected heterozygosity ( $H_E$ ) estimates and inbreeding coefficient ( $G_{IS}$ ) per population for all *Calotriton arnoldi* (A: Eastern Montseny, B: Western Montseny) and three *C. asper* populations inferred from ddRADseq data with GenoDive.  $H_O$  was higher for *C. asper* than for *C. arnoldi*, and within Montseny, slightly higher for Western than Eastern Montseny.  $G_{IS}$  was, in all cases but one, negative, i.e. heterozygosity was higher than expected. Related to Figure 4A.**

| Population | $H_O$ | $H_E$ | $G_{IS}$ |
|------------|-------|-------|----------|
| A1         | 0.008 | 0.007 | -0.145   |
| A2.1       | 0.007 | 0.006 | -0.105   |
| A2.2       | 0.008 | 0.007 | -0.127   |
| A3         | 0.009 | 0.008 | -0.120   |
| B1         | 0.011 | 0.009 | -0.123   |
| B2         | 0.010 | 0.009 | -0.109   |
| B3         | 0.009 | 0.007 | -0.232   |
| B4         | 0.011 | 0.009 | -0.132   |
| B5         | 0.010 | 0.009 | -0.107   |
| O2.1       | 0.055 | 0.042 | -0.315   |
| O2.2       | 0.049 | 0.037 | -0.343   |
| O3         | 0.121 | 0.124 | 0.022    |

**Table S8. Mean $\pm$ SD number of Runs of Homozygosity (ROHs) in the largest 50 scaffolds (11.6-7.1 Mbp) of 16 wild *Calotriton arnoldi* (10 from Western and 6 from Eastern Montseny lineages), 5 *C. asper* individuals, and 1 *C. arnoldi* from the breeding programme (F1, Eastern Montseny lineage) from lcWGS. Related to Figure 4B.**

| ROH length (Mb) | Mean number of ROH $\pm$ SD |                         |                 |                       |
|-----------------|-----------------------------|-------------------------|-----------------|-----------------------|
|                 | Eastern Montseny (n=6)      | Western Montseny (n=10) | Pyrenees (n=5)  | Breeding center (n=1) |
| 0.5-1           | 125.0 $\pm$ 21.80           | 145.0 $\pm$ 9.99        | 35.0 $\pm$ 6.63 | 128                   |
| 1-2             | 91.3 $\pm$ 8.21             | 88.3 $\pm$ 6.90         | 1.0 $\pm$ 1.00  | 102                   |
| 2-3             | 24.8 $\pm$ 8.59             | 17.0 $\pm$ 4.24         | 0.0 $\pm$ 0.00  | 25                    |
| >3              | 9.0 $\pm$ 4.82              | 3.0 $\pm$ 1.49          | 0.0 $\pm$ 0.00  | 10                    |

**Table S9. Population-pairwise fixation indices ( $F'_{ST}$ ) for all *Calotriton arnoldi* (A: Eastern Montseny, B: Western Montseny) and three *C. asper* populations (O2-3) below diagonal and respective p-values above thereof.** Population comparisons between Western and Eastern Montseny yielded  $F'_{ST}$  values similar to between-species comparisons. Related to Figure 4C.

|      | A1     | A2.1  | A2.2   | A3     | B1     | B2     | B3     | B4     | B5     | O2.1   | O2.2  | O3     |
|------|--------|-------|--------|--------|--------|--------|--------|--------|--------|--------|-------|--------|
| A1   | -      | 0.184 | 0.148  | <0.001 | <0.001 | <0.001 | <0.001 | <0.001 | <0.001 | <0.001 | 0.001 | <0.001 |
| A2.1 | <0.001 | -     | <0.001 | <0.001 | <0.001 | <0.001 | <0.001 | <0.001 | <0.001 | <0.001 | 0.007 | 0.001  |
| A2.2 | <0.001 | 0.066 | -      | <0.001 | <0.001 | <0.001 | <0.001 | <0.001 | <0.001 | <0.001 | 0.003 | <0.001 |
| A3   | 0.133  | 0.22  | 0.223  | -      | <0.001 | <0.001 | <0.001 | <0.001 | <0.001 | <0.001 | 0.001 | <0.001 |
| B1   | 0.892  | 0.89  | 0.892  | 0.89   | -      | 0.078  | <0.001 | 0.029  | 0.283  | <0.001 | 0.005 | <0.001 |
| B2   | 0.895  | 0.894 | 0.896  | 0.894  | <0.001 | -      | <0.001 | <0.001 | <0.001 | <0.001 | 0.002 | <0.001 |
| B3   | 0.914  | 0.919 | 0.918  | 0.913  | 0.179  | 0.183  | -      | <0.001 | <0.001 | <0.001 | 0.001 | <0.001 |
| B4   | 0.886  | 0.882 | 0.885  | 0.885  | 0.015  | 0.086  | 0.212  | -      | <0.001 | <0.001 | 0.001 | <0.001 |
| B5   | 0.891  | 0.889 | 0.891  | 0.89   | 0.011  | 0.064  | 0.162  | 0.021  | -      | <0.001 | 0.003 | <0.001 |
| O2.1 | 0.998  | 0.997 | 0.997  | 0.998  | 0.997  | 0.997  | 0.998  | 0.997  | 0.997  | -      | 0.006 | <0.001 |
| O2.2 | 0.999  | 0.998 | 0.998  | 0.999  | 0.998  | 0.998  | 0.999  | 0.998  | 0.998  | 0.181  | -     | 0.012  |
| O3   | 0.993  | 0.99  | 0.992  | 0.993  | 0.99   | 0.993  | 0.994  | 0.992  | 0.991  | 0.603  | 0.486 | -      |

**Table S10. Mean±SD of 20 cross validation (CV) errors from Admixture analyses with two different datasets.** For each dataset, Admixture was run for K values ranging from 1 to the number of different sampled populations, i.e. twelve for the *general* dataset with outgroup and nine for the *C. arnoldi* dataset (Table S12). Results support clear differences in between Eastern Montseny, Western Montseny and Pyrenean brook newts (K3, *general* dataset). Related to Figure 5A.

| K  | <i>general</i>       | <i>no_outgroup</i>   |
|----|----------------------|----------------------|
| 1  | 0.4926±0.0003        | 0.3645±0.0004        |
| 2  | 0.0999±0.0002        | 0.1662±0.0003        |
| 3  | <b>0.0663±0.0128</b> | 0.1695±0.0011        |
| 4  | 0.0573±0.0034        | 0.1728±0.0006        |
| 5  | 0.0564±0.0034        | <b>0.1773±0.0009</b> |
| 6  | 0.0557±0.0049        | 0.1813±0.001         |
| 7  | 0.0546±0.0043        | 0.1857±0.0011        |
| 8  | 0.0571±0.007         | 0.1909±0.0012        |
| 9  | 0.0536±0.0045        | 0.1956±0.0012        |
| 10 | 0.0542±0.0045        | -                    |
| 11 | 0.0561±0.0067        | -                    |
| 12 | 0.0561±0.008         | -                    |

**Table S11. Loci count using different clustering thresholds and assembly methods of ddRADseq data with ipyrad.** Reference-assisted assembly yielded the highest number of retrieved loci.

| <b>Assembly</b>    | <b>Clustering threshold</b> | <b>RAD loci</b> |
|--------------------|-----------------------------|-----------------|
| <i>de novo</i>     | 0.85                        | 118,993         |
| <i>de novo</i>     | 0.89                        | 133,846         |
| <i>de novo</i>     | 0.92                        | 147,214         |
| <i>de novo</i>     | 0.95                        | 162,745         |
| Reference-assisted | -                           | 233,171         |

**Table S12. ddRADseq datasets produced, with the number of samples and species comprised, retrieved SNPs, the filters applied and the analyses in which they have been used.** For more information about filters see STAR Methods: Method Details: Processing of ddRADseq data.

| Dataset               | Samples | Taxa                      | Data amount     | Used for                           | Postprocessing filtering                                                                                                                                                                                                       |
|-----------------------|---------|---------------------------|-----------------|------------------------------------|--------------------------------------------------------------------------------------------------------------------------------------------------------------------------------------------------------------------------------|
| <i>general</i>        | 132     | <i>Calotriton</i> spp.    | 9,470 uSNPs     | PCA, Admixture, Genodive, prabclus | Common markers; 75% individual & 15% genotype missingness allowed; MAC=1; removing monomorphic sites and extreme heterozygote excess; keep only biallelics; LD-pruning 0.5 correlation within 50-SNP windows.                  |
| <i>no_outgroup</i>    | 115     | <i>Calotriton arnoldi</i> | 1,339 uSNPs     | PCA, Admixture, divMigrate         | Common markers; 30% genotype missingness allowed; MAC = 1; removing monomorphic sites and extreme heterozygote excess; keep only biallelics; LD-pruning 0.5 correlation within 50-SNP windows.                                 |
| <i>no_missingness</i> | 7       | <i>Calotriton</i> spp.    | 8,139 uSNPs     | SNAPP                              | 0% genotype missingness allowed; removing monomorphic sites and extreme heterozygote excess; keep only biallelics; LD-pruning 0.5 correlation within 50-SNP windows                                                            |
| <i>loci</i>           | 132     | <i>Calotriton</i> spp.    | 1,402,750 sites | RAxML-NG                           | 15% genotype missingness allowed.                                                                                                                                                                                              |
| <i>no_relatives</i>   | 88      | <i>Calotriton</i> spp.    | 8,841 uSNPs     | Stairwayplot2, Fastsimcoal2        | 1st degree or closer relatives excluded; common markers; 15% genotype missingness allowed; removing monomorphic sites and extreme heterozygote excess; keep only biallelics; LD-pruning 0.5 correlation within 50-SNP windows. |



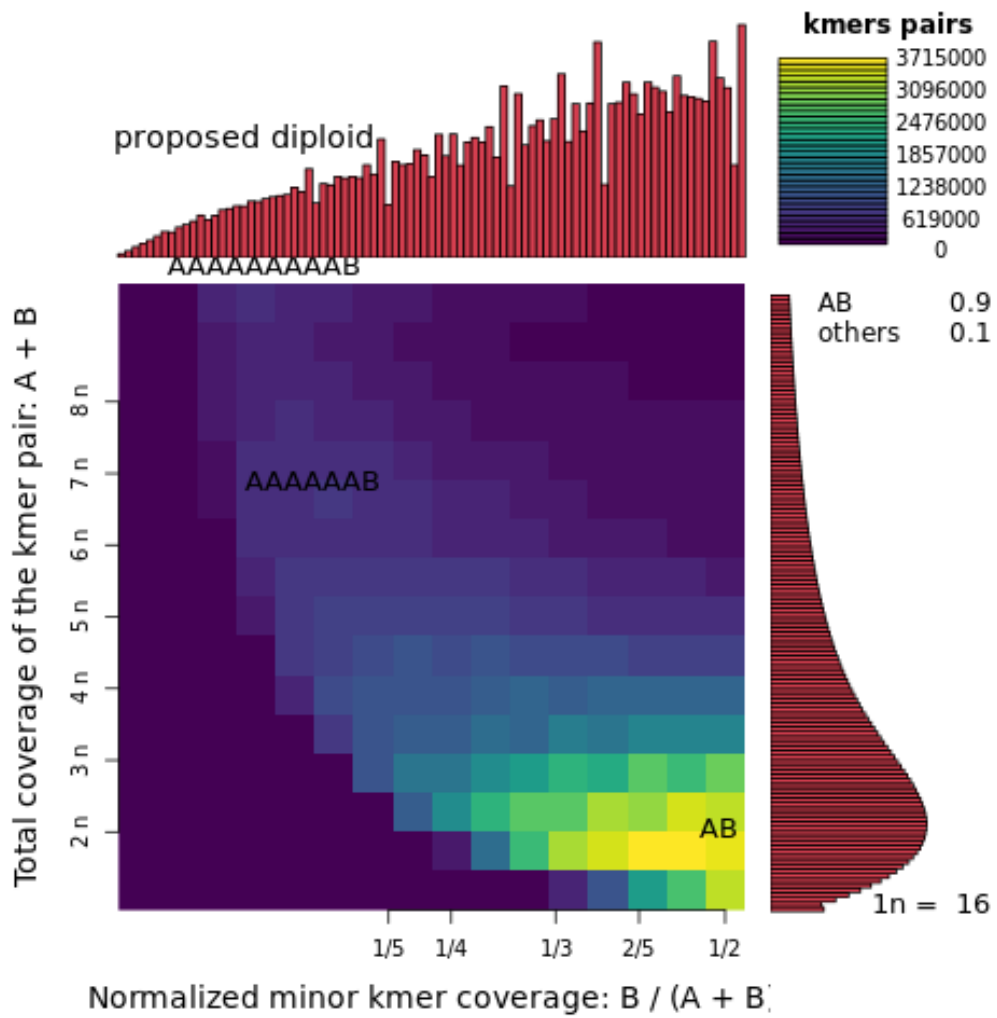

**Figure S1. Smudgeplot based on 22-mer database to check the diploidy of *Calotriton arnoldi*.** Most of the proportion of k-mers follow a proportion AB (0.9) indicating a diploidy for the species. It does not exclude the possibility of a specific chromosome having a different ploidy than the rest.

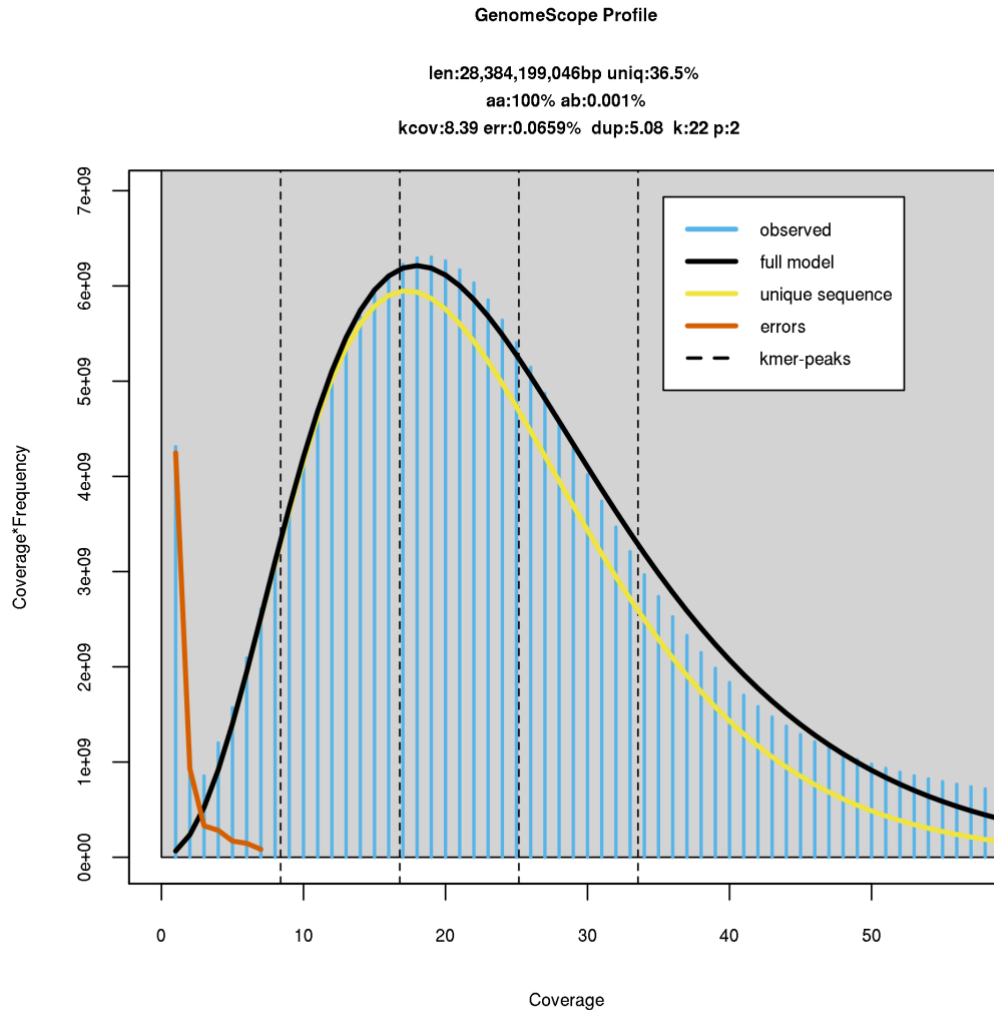

**Figure S2. GenomeScope v2.0 analysis graph profile employed to estimate genome haploid length, proportion of repeats and heterozygosity of *Calotriton arnoldi*.** The k-mer genome profiling shows one homozygous peak ( $2n$ ) at around 19X coverage, providing a highly homozygous genome estimate (ab: 0.001%). Observed k-mer profile fits within the diploid model with a typical error crest at low k-mer counts. Estimated genome size is >28 Gb (len: 28,384,199,046 bp) with more than 63% of repetitive content (uniq: 36.5%).

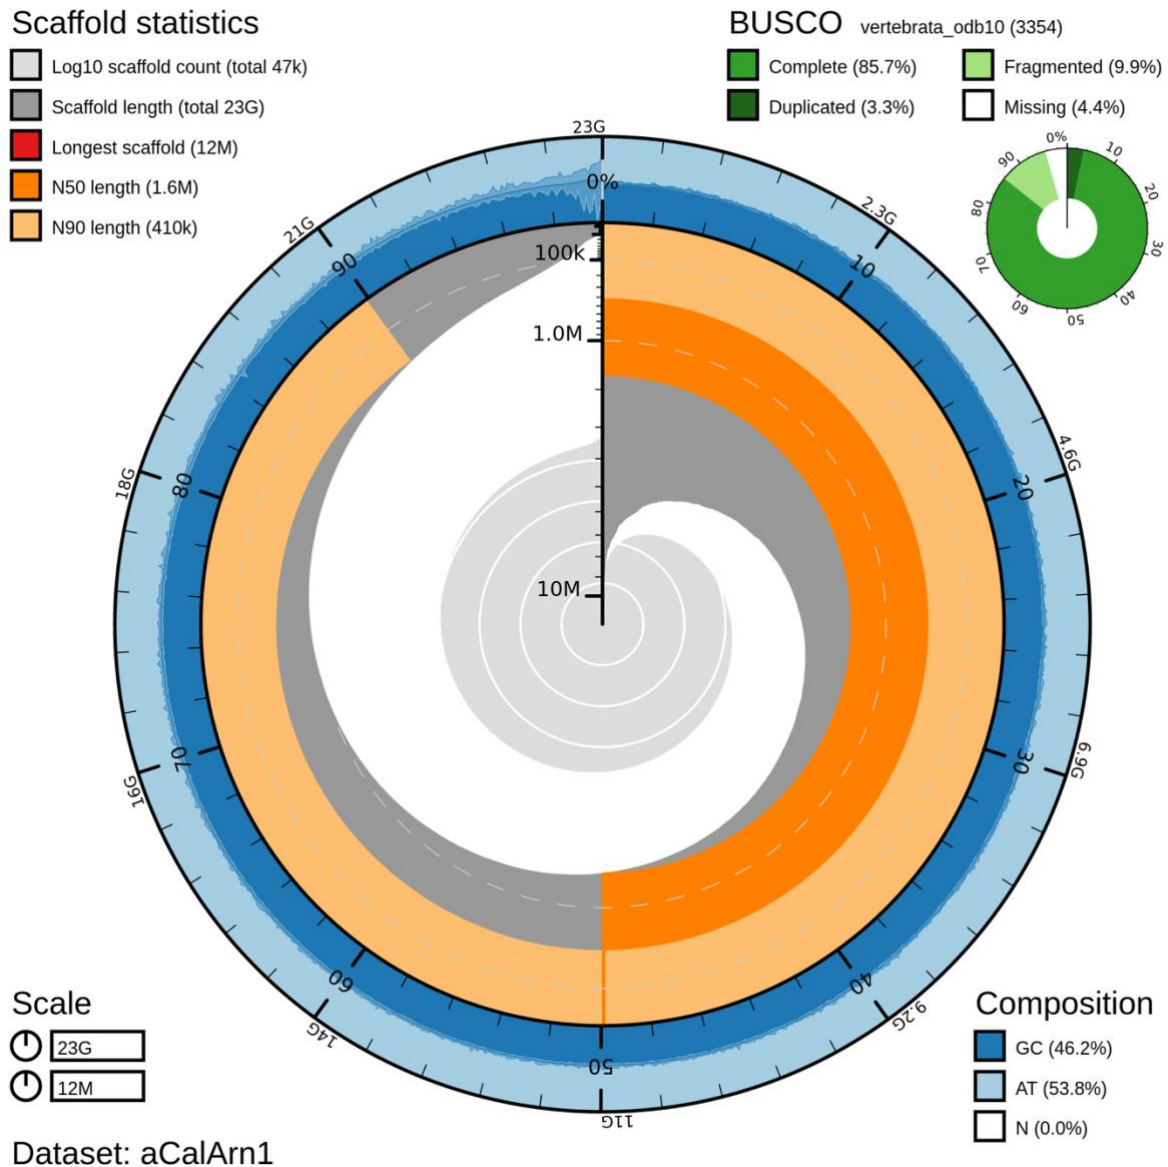

**Figure S3. Snail plot of *Calotriton arnoldi* reference genome assembly presented in this study (aCalArn1) summarizing some contiguity and completeness metrics.** M=Mega bases; G=Giga bases; k=kilo bases. The scaffolds contained in the assembly are shown ordered by length in the inner circle of the snail plot. The sequences within the N50 (1.6M) and N90 (410k) length marks are painted in dark or light orange, respectively. In the outer circle, the GC content of the sequences is represented in blue, whereas AT content in pale blue. Top left corner shows contiguity statistics like the longest scaffold (12M) or Scaffold length (total 23G) which indicates the assembly size. Top right corner represents the assembly genetic completeness using BUSCO scores with odb10 vertebrata database with 3354 genes, with 85.7% of the database genes found as Single-Copy Complete genes. Bottom left has a legend with the length in bases represented in the snail plot, the perimeter (23G) and the radius (12M, i.e., the longest scaffold).

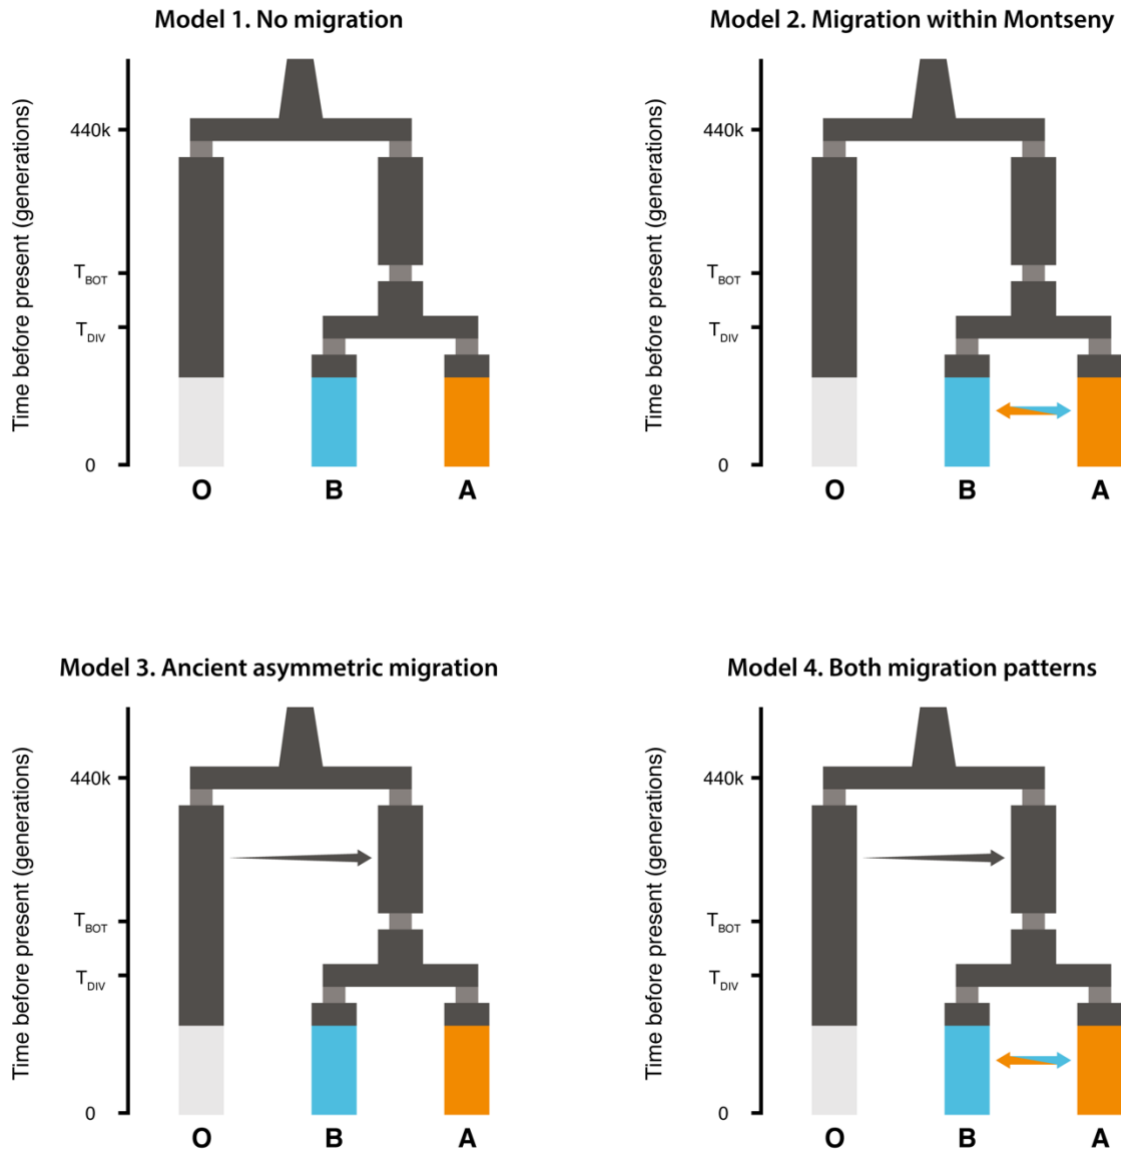

**Figure S4. Fastsimcoal population tree models with same topology but allowing different migration matrices.** The first model lacks migration at all, the second one is allowed for recent migration between *C. arnoldi* lineages, the third for ancient asymmetrical migration from *C. asper* to *C. arnoldi*; and the fourth model including both migrations patterns. The most likely model was number 4, allowing both types of migration. Western Montseny *C. arnoldi* in blue, Eastern Montseny *C. arnoldi* in orange, Pyrenean brook newt *C. asper* in grey.  $T_{BOT}$ , bottleneck time;  $T_{DIV}$ , *C. arnoldi* divergence time. Divergence time between *C. arnoldi* and *C. asper* was fixed in 440k generations ago.

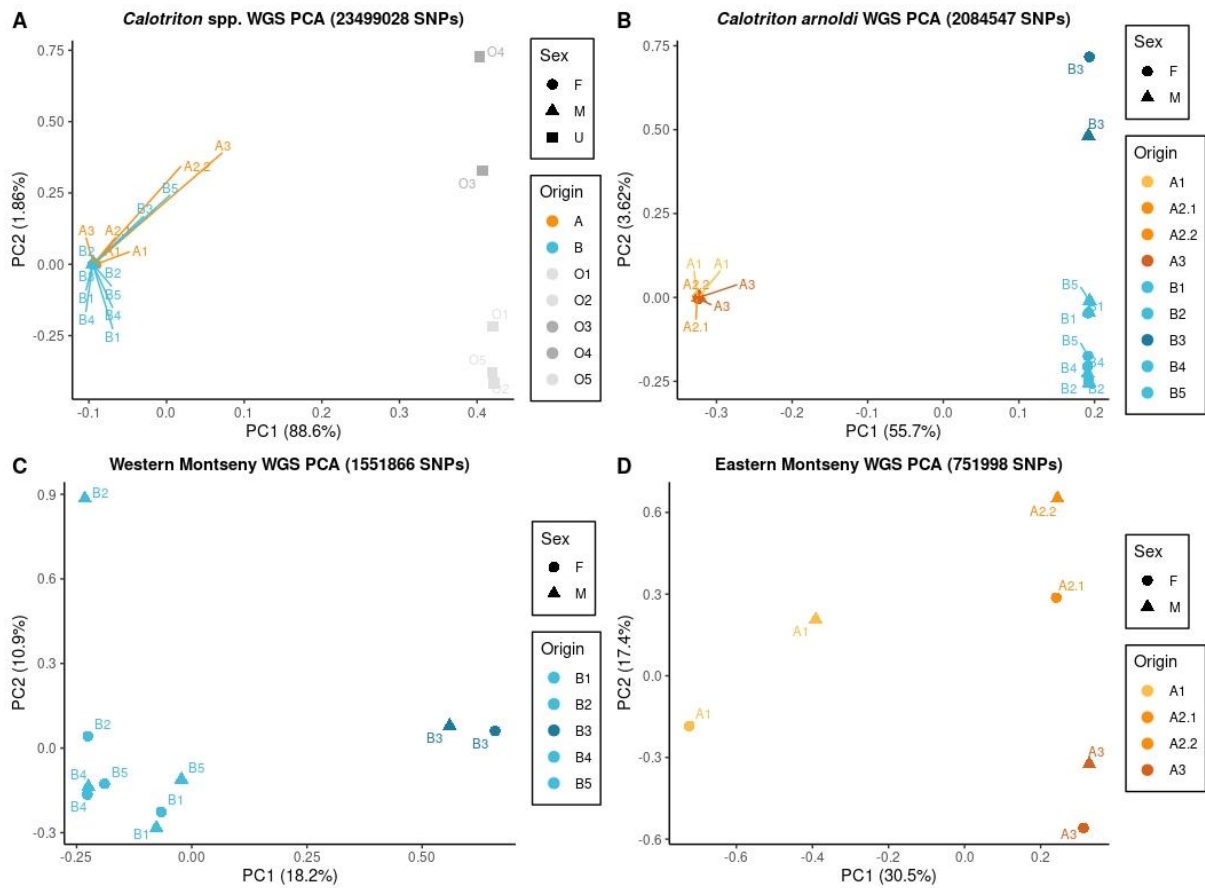

**Figure S5. Hierarchical genomic PCAs from lcWGS with one male and female from each Montseny population and five representatives of *C. asper* diversity.** A) shows both brook newt species with >23M SNPs. B) is restricted to Montseny, showing the split between Eastern and Western Montseny lineages along PC1. C, D) show within-lineage PCAs at the Western and Eastern submassifs, respectively.

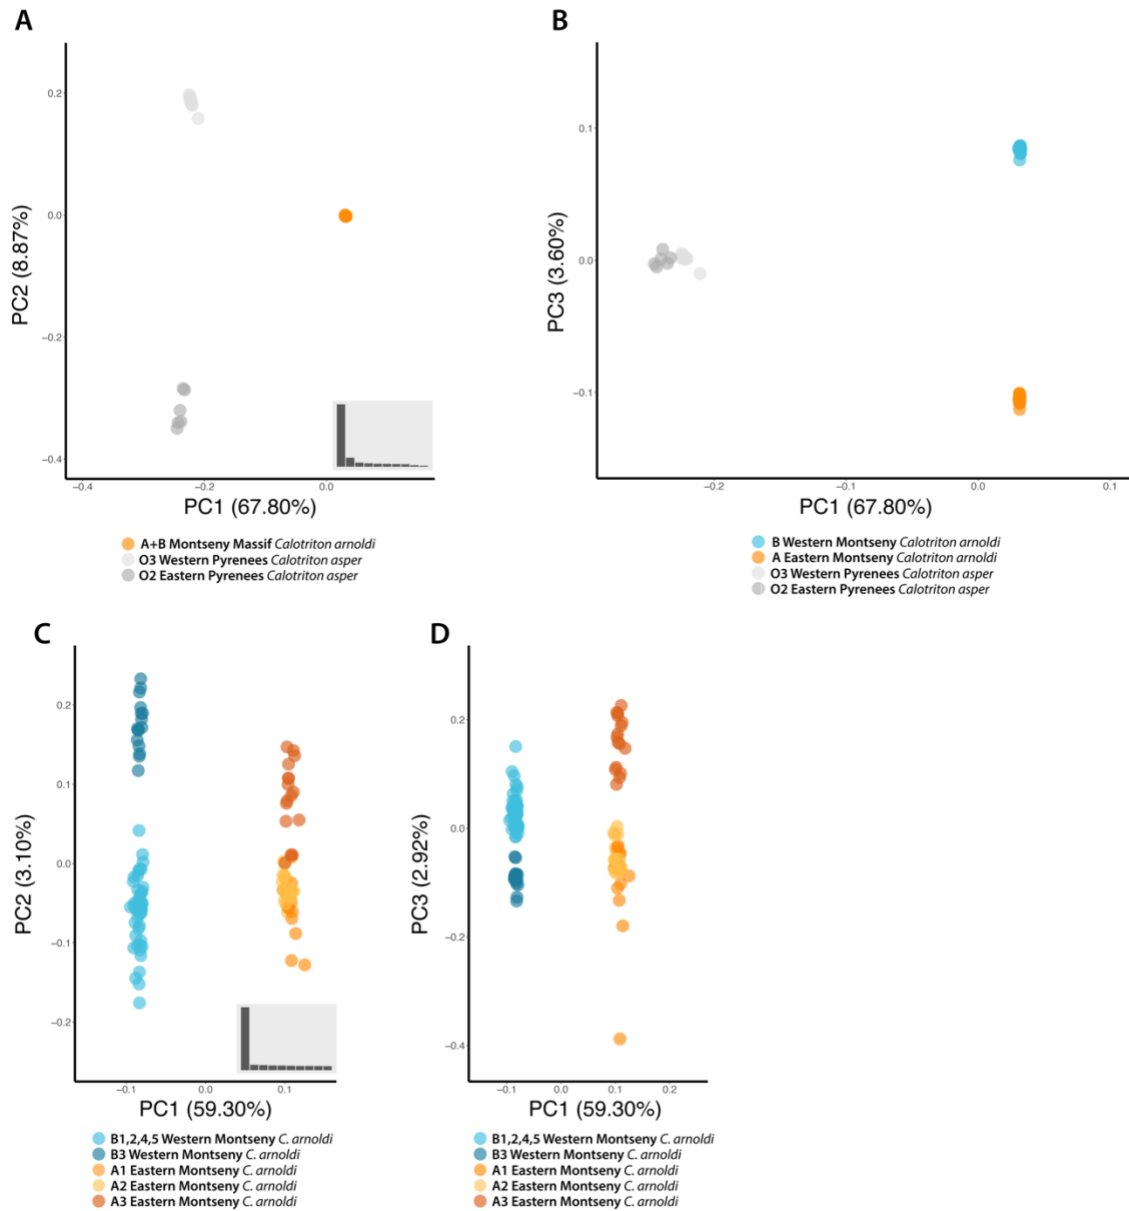

**Figure S6. Genomic genus- and species-level PCAs from 132 ddRADseq samples (9,470 and 1,339 uSNPs, respectively).** A and B) show, at genus level, the split between *Calotriton* species (PC1), Western-Eastern Pyrenees (PC2) and Western-Eastern Montseny (PC3). C and D) illustrate, at species level, the split between Western and Eastern Montseny (PC1), as well as within-lineage diversity (PC2-3). Histograms in A and C show the proportion of variance explained by the first ten Principal Components of the genus- and species-level PCAs, respectively.

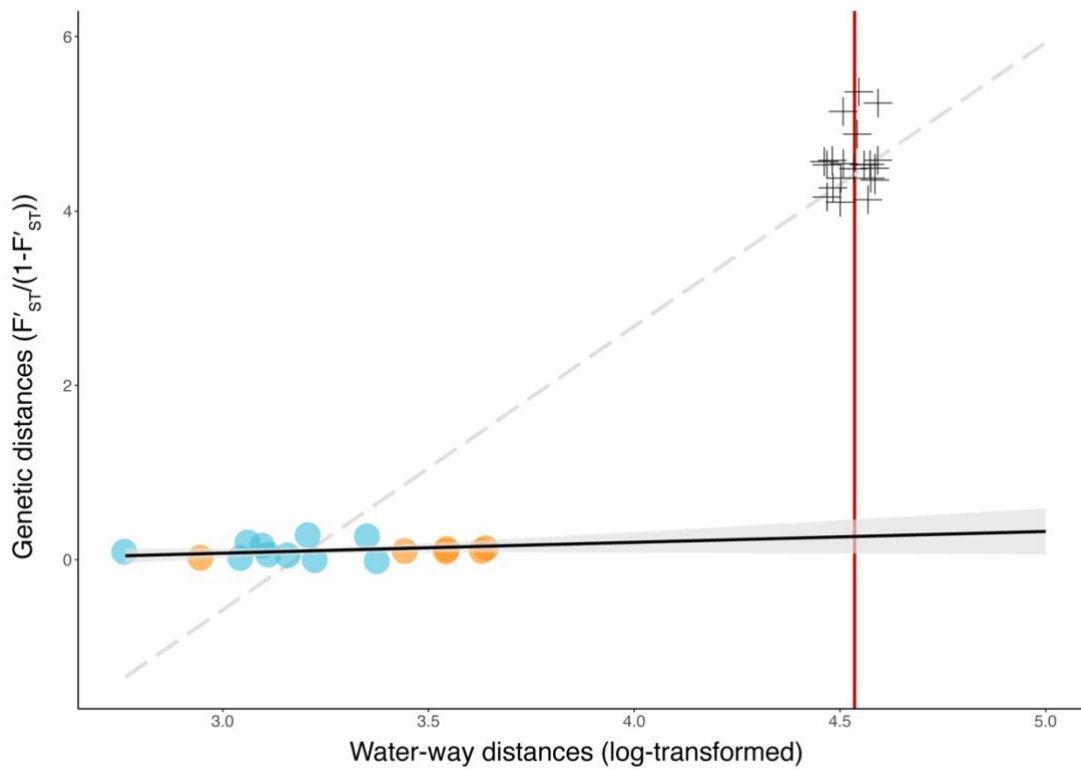

**Figure S7. Relationships between genomic and log-transformed water-way geographical distances in pairs of populations of the two *C. arnoldi* lineages to explore Isolation-by-Distance patterns (IBD).** Genomic distances are measured by  $F'_{ST}/(1-F'_{ST})$  from ddRADseq data, whereas geographical distances are measured in log-transformed water-way distances in meters, to account for the dispersal constraints of the species. Blue and orange circles: distances between populations belonging to Western and Eastern Montseny, respectively. Black crosses: distances between populations belonging to different lineages. Black solid line: regression line fitted only for within-lineages comparisons (i.e., blue and orange circles) and its 95% CI in light grey. Dashed grey line: regression line fitted for all comparisons, either within- or between-lineages (circles and crosses), i.e., the IBD pattern needed to explain lineage differences exclusively due to distance. Red vertical line: center of between-lineages geographical distances. IBD shows the same pattern within the Western and Eastern submassifs: i.e., is explained in both lineages by the same slope (black solid line). However, genomic differences between lineages cannot be explained by the same IBD pattern (the dashed grey line is significantly different than the black one).

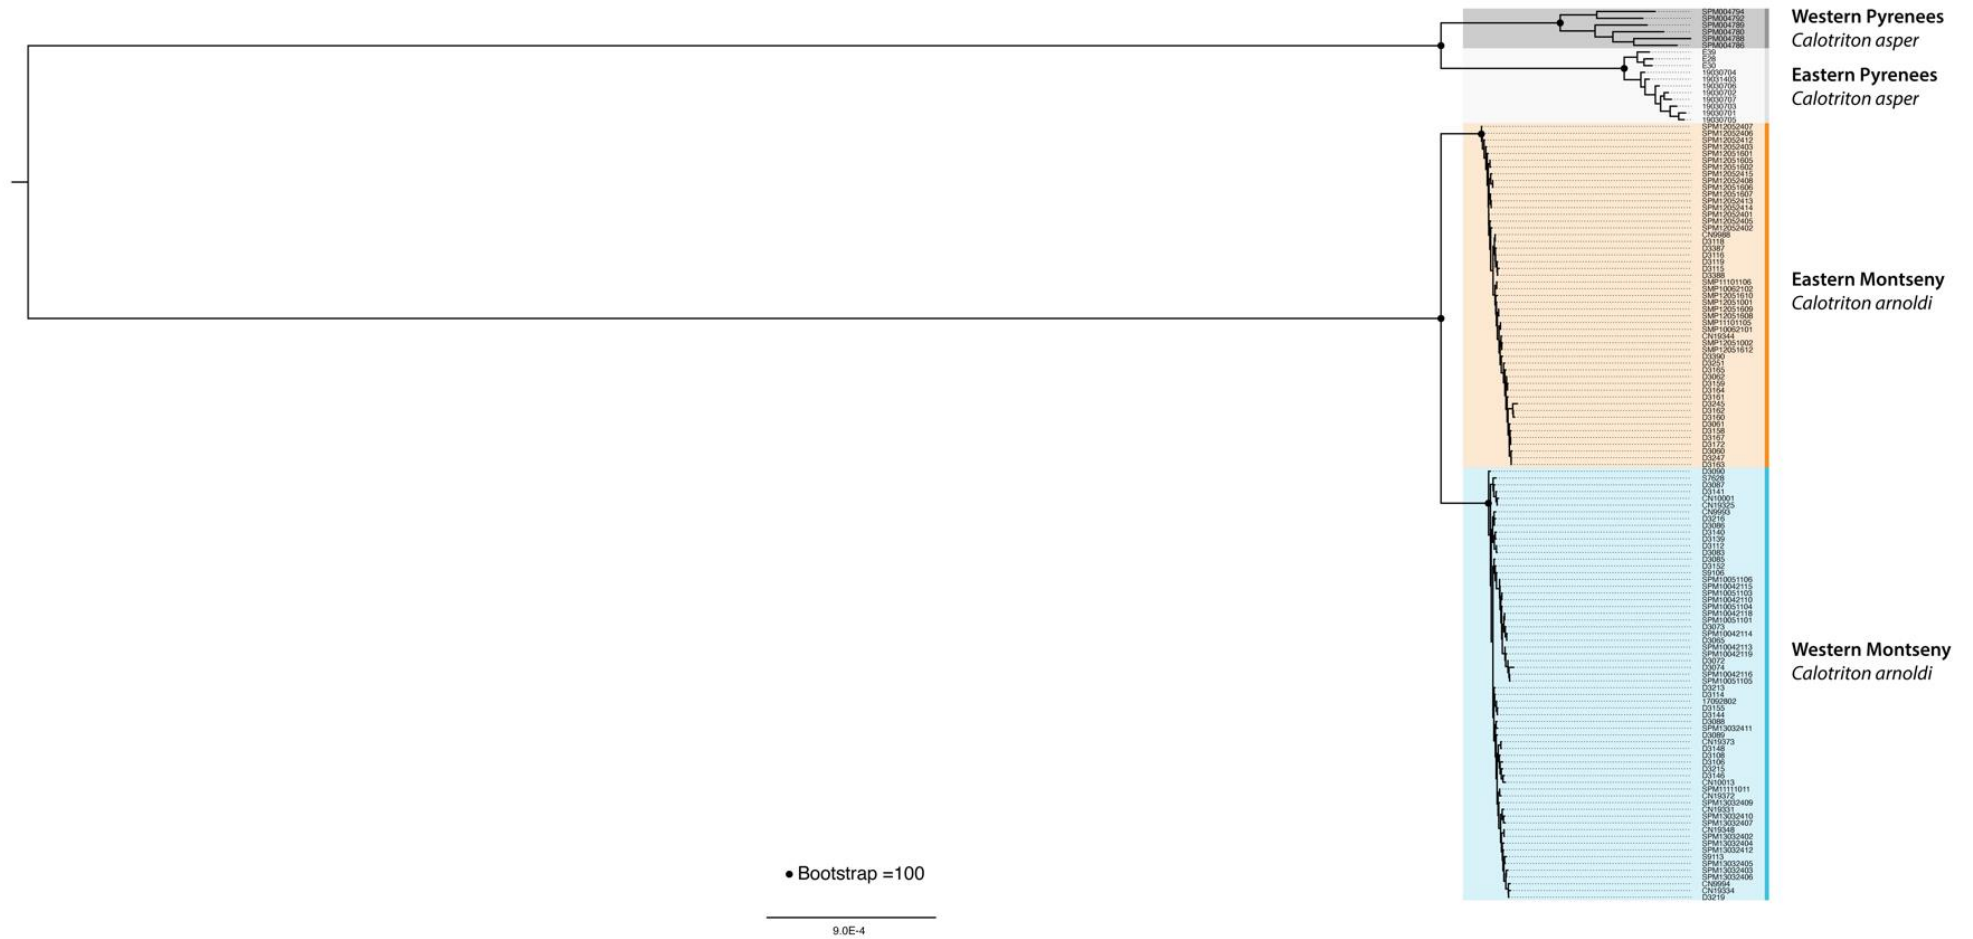

**Figure S8. ML phylogeny with 132 ddRAD samples by RAxML-NG with GTRGAMMA model from 50 random and 50 parsimony-based starting trees and 1,000 bootstrap replicates.** The four intra-specific lineages are monophyletic (Western and Eastern Montseny and Western and Eastern Pyrenees; black circles, bootstrap value=100).
